# Supplementary material for: Mechanisms of recovery of visual function in adult amblyopia through a tailored action video game
Source: PubMed Central journal article supplement — Sci Rep. 2015 Feb 26;5:8482. doi: 10.1038/srep08482 (PMC4894407; doi:10.1038/srep08482), 2015-02-26
Supplement: srep08482-s1.pdf [file srep08482-s1.pdf]

# Mechanisms of recovery of visual function in adult amblyopia through a tailored action video game.

Indu Vedamurthy<sup>1</sup>, Mor Nahum<sup>2</sup>, Daphne Bavelier<sup>1</sup> & Dennis M. Levi<sup>2</sup>

## SUPPLEMENTAL FIGURE S1.

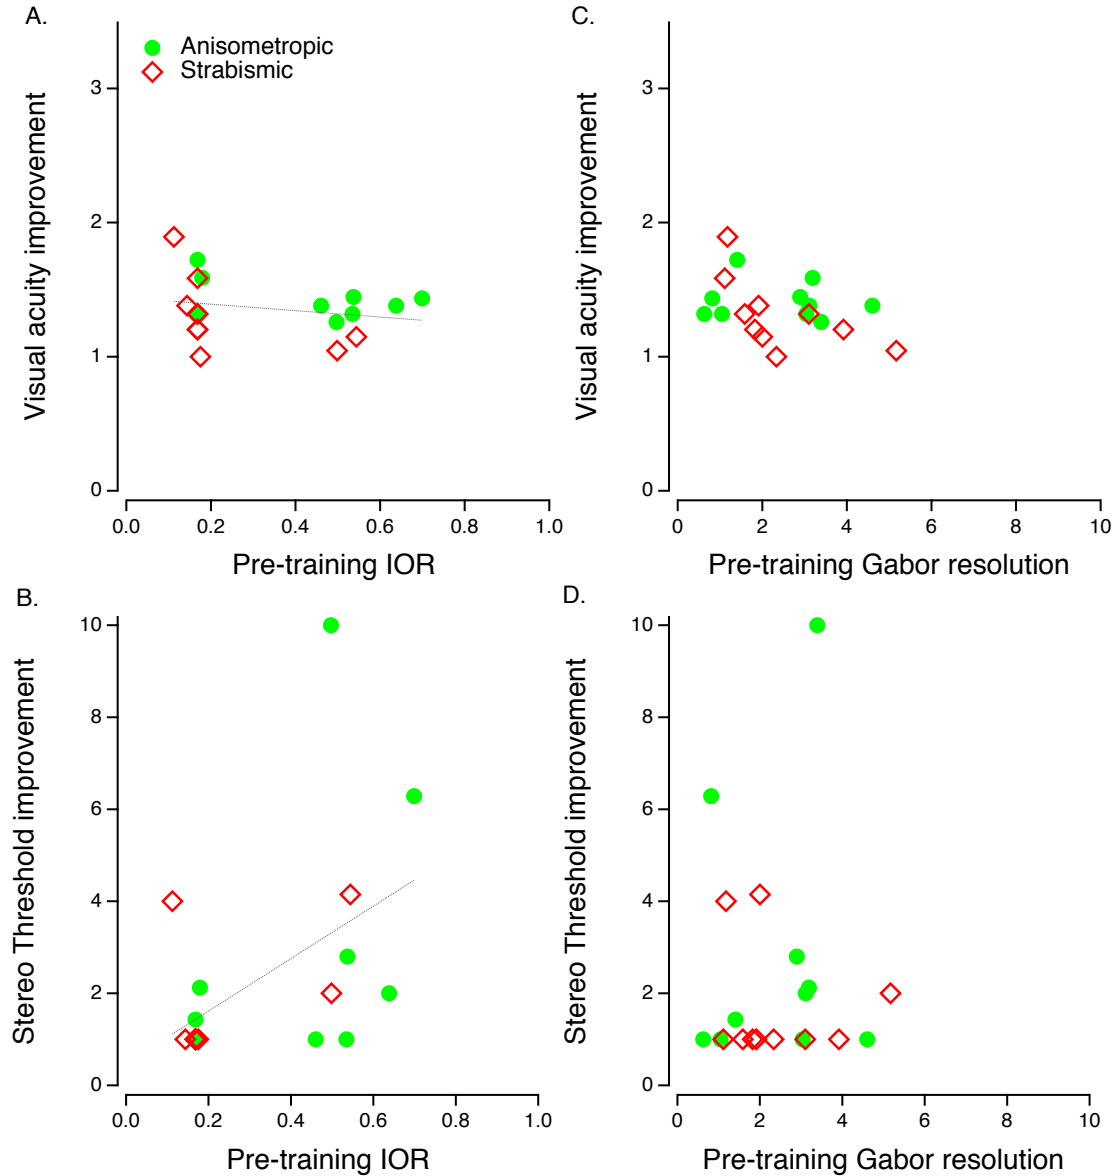

**Fig. S1 A.** Scatter plot illustrating the lack of correlation between training induced changes in visual acuity (ordinate) and the absolute Pre-training IOR (abscissa). Training induced changes are denoted as pre versus post ratios; ratio > 1 represents improved performance following training. **B.** Scatter plot illustrating a positive correlation between training induced improvements in stereopsis and absolute Pre-training IOR. **C.** Scatter plot illustrating the

lack of correlation between training induced changes in visual acuity (ordinate) and the absolute Pre-training Gabor resolution (c/deg). **D.** Scatter plot illustrating the lack of significant correlation between training induced changes in stereopsis (ordinate) and the absolute Pre-training Gabor resolution (c/deg).
